# Supplementary material
Source: PubMed Central journal article supplement (PMC9126503)
Supplement: NIHMS1780804-supplement-supplementary_file.pdf [file NIHMS1780804-supplement-supplementary_file.pdf]

# Supplementary Materials for “Transformation model based regression with dependently truncated and independently censored data”

Jing Qian<sup>1‡</sup>, Sy Han Chiou<sup>2</sup>, and Rebecca A. Betensky<sup>3</sup>

<sup>1</sup>*University of Massachusetts, Amherst, USA*

<sup>2</sup>*University of Texas at Dallas, Richardson, USA*

<sup>3</sup>*New York University, New York, USA*

<sup>‡</sup>*E-mail: qian@umass.edu*

Table [S1](#) presents the values of parameters  $\phi$ ,  $a$ (or  $\theta$ ),  $r$  under each simulation scenario in Section 4 of the main paper. Table [S2](#) and Table [S6](#) present the average bias for the transformation parameter estimates for the simulation setups in Section 4.1 and in Section 4.2 of the main paper, respectively. Table [S3](#) presents empirical bias of  $\hat{\beta}$  under simulation setup in Section 4.1 with 10,000 replications. Table [S4](#) lists the power analysis for the hypothesis tests  $H_0 : \beta = 0.8$  versus  $H_1 : \beta > 0.8$  based on the estimates of  $\beta$  under the simulation setup in Section 4.1. Table [S5](#) presents additional summary statistics for the simulation setup in Section 4.1, including the value of minimum  $||\hat{\alpha}||$  in equation (4) for Cox1 and Cox2 approaches, and the p-value of the test for conditional independence between  $X$  and  $T$  given covariate  $Z$ . The test for conditional independence follows the global likelihood ratio test described in Section 4.3 of the main paper.

Table S1: Values of the parameters  $\phi$ ,  $a$ (or  $\theta$ ),  $r$  in simulation setups in Section 4<sup>†</sup>

| censoring<br>rate                | $\tau = 0.2$ |                    |      | $\tau = 0.35$ |                    |      |
|----------------------------------|--------------|--------------------|------|---------------|--------------------|------|
|                                  | $\phi$       | $a$ (or $\theta$ ) | $r$  | $\phi$        | $a$ (or $\theta$ ) | $r$  |
| Simulation setups in Section 4.1 |              |                    |      |               |                    |      |
| 0%                               | 1.60         | -0.14              | –    | 1.60          | -0.33              | –    |
| 15%                              | 1.47         | -0.13              | 0.07 | 1.35          | -0.28              | 0.08 |
| 30%                              | 1.28         | -0.11              | 0.14 | 1.18          | -0.24              | 0.17 |
| 50%                              | 1.13         | -0.09              | 0.24 | 1.01          | -0.19              | 0.27 |
| Simulation setups in Section 4.2 |              |                    |      |               |                    |      |
| 0%                               | 2.20         | -0.20              | –    | 1.50          | -0.50              | –    |
| 15%                              | 3.00         | -0.25              | 4.00 | 1.50          | -0.40              | 4.50 |
| Simulation setups in Section 4.3 |              |                    |      |               |                    |      |
| 0%                               | 1.00         | 2.00               | –    | 0.80          | 6.00               | –    |
| 15%                              | 1.00         | 1.64               | 0.65 | 1.00          | 3.00               | 0.50 |

<sup>†</sup> $a$ , the parameter in the linear transformation model;  $\theta$ , the Clayton copula parameter.

Table S2: Absolute bias of  $\hat{a}$ , the estimator for transformation parameter  $a$ , under simulation setup in Section 4.1<sup>†</sup>

| $\tau$ | cen | bias( $\hat{a}$ )     |                         |                         | bias( $\hat{a}$ )     |                         |                         |
|--------|-----|-----------------------|-------------------------|-------------------------|-----------------------|-------------------------|-------------------------|
|        |     | $\hat{a}_{\text{CK}}$ | $\hat{a}_{\text{Cox1}}$ | $\hat{a}_{\text{Cox2}}$ | $\hat{a}_{\text{CK}}$ | $\hat{a}_{\text{Cox1}}$ | $\hat{a}_{\text{Cox2}}$ |
|        |     | $n = 200$             |                         |                         | $n = 500$             |                         |                         |
| 0.2    | 0%  | <0.001                | <0.001                  | 0.007                   | <0.001                | <0.001                  | 0.003                   |
|        | 15% | 0.001                 | 0.002                   | 0.010                   | 0.001                 | <0.001                  | 0.004                   |
|        | 30% | <0.001                | <0.001                  | 0.009                   | <0.001                | <0.001                  | 0.002                   |
|        | 50% | 0.002                 | 0.003                   | 0.009                   | <0.001                | 0.002                   | 0.005                   |
| 0.35   | 0%  | <0.001                | <0.001                  | 0.005                   | <0.001                | <0.001                  | 0.002                   |
|        | 15% | <0.001                | <0.001                  | 0.007                   | 0.001                 | <0.001                  | 0.004                   |
|        | 30% | 0.001                 | 0.001                   | 0.008                   | <0.001                | <0.001                  | 0.003                   |
|        | 50% | 0.002                 | 0.003                   | 0.010                   | <0.001                | <0.001                  | 0.004                   |

<sup>†</sup>the subscripts for  $\hat{a}$  represent different proposed methods; CK, unadjusted transformation via conditional Kendall's tau; Cox1, adjusted transformation via Cox model with continuous  $T'(a)$ ; Cox2, adjusted transformation via Cox model with the first and second tertiles of  $T'(a)$ .

Table S3: Bias of  $\hat{\beta}$  under simulation setup in Section 4.1 with 10,000 replications<sup>†</sup>

| $\tau$    | cen | bias( $\hat{\beta}$ ) |         |         |         |         |
|-----------|-----|-----------------------|---------|---------|---------|---------|
|           |     | Cox QI                | JC      | CK      | Cox1    | Cox2    |
| $n = 200$ |     |                       |         |         |         |         |
| 0.2       | 0%  | -0.0822               | -0.1157 | 0.0038  | 0.0022  | 0.0033  |
|           | 15% | -0.0731               | -0.1046 | 0.0035  | 0.0014  | 0.0035  |
|           | 30% | -0.0564               | -0.0823 | 0.0013  | -0.0013 | 0.0013  |
|           | 50% | -0.0420               | -0.0609 | 0.0043  | -0.0076 | 0.0048  |
| 0.35      | 0%  | -0.2804               | -0.4273 | 0.0038  | 0.0022  | 0.0020  |
|           | 15% | -0.2241               | -0.3665 | 0.0034  | 0.0014  | 0.0028  |
|           | 30% | -0.1836               | -0.3158 | -0.0001 | -0.0027 | -0.0007 |
|           | 50% | -0.1338               | -0.2423 | -0.0076 | -0.0106 | -0.0083 |

<sup>†</sup>Cox QI, Cox model assuming independent truncation; JC, Jones & Crowley's method; CK, unadjusted transformation via conditional Kendall's tau; Cox1, adjusted transformation via Cox model with continuous  $T'(a)$ ; Cox2, adjusted transformation via Cox model with first and second tertiles of  $T'(a)$ .

Table S4: Power analysis for hypothesis test  $H_0 : \beta = 0.8$  v.s.  $H_1 : \beta > 0.8$  under simulation setup in Section 4.1<sup>†</sup>

| $\tau$    | cen | Power (%) |      |      |      |      |
|-----------|-----|-----------|------|------|------|------|
|           |     | Cox       | QI   | JC   | CK   | Cox1 |
| $n = 200$ |     |           |      |      |      |      |
| 0.2       | 0%  | 20.4      | 12.0 | 51.6 | 49.2 | 44.5 |
|           | 15% | 23.3      | 13.7 | 49.2 | 46.1 | 44.3 |
|           | 30% | 22.5      | 16.5 | 38.2 | 36.3 | 36.8 |
|           | 50% | 26.9      | 18.5 | 37.5 | 35.1 | 34.3 |
| 0.35      | 0%  | 0         | 0    | 51.6 | 49.2 | 39.4 |
|           | 15% | 1.0       | 0    | 48.8 | 45.7 | 42.1 |
|           | 30% | 1.8       | 0    | 38.2 | 36.3 | 36.8 |
|           | 50% | 7.5       | 0.6  | 34.8 | 32.7 | 31.1 |
| $n = 500$ |     |           |      |      |      |      |
| 0.2       | 0%  | 43.3      | 20.9 | 90.6 | 87.9 | 88.5 |
|           | 15% | 47.8      | 24.0 | 87.5 | 86.0 | 86.2 |
|           | 30% | 54.2      | 37.7 | 80.8 | 79.2 | 79.3 |
|           | 50% | 61.6      | 46.0 | 75.9 | 73.5 | 75.5 |
| 0.35      | 0%  | 0         | 0    | 90.6 | 87.9 | 87.7 |
|           | 15% | 1.0       | 0    | 87.9 | 86.0 | 85.5 |
|           | 30% | 3.0       | 0    | 79.7 | 78.5 | 79.0 |
|           | 50% | 13.0      | 0.1  | 76.3 | 74.5 | 75.7 |

<sup>†</sup>See footnotes of Table S3.

Table S5: Summary of statistics under simulation setup in Section 4.1<sup>†</sup>

| $\tau$    | cen | value of minimum<br>$  \hat{\alpha}  $ in eqn. (4) |       | p-value of test<br>assessing $X \perp T Z$ |                        |
|-----------|-----|----------------------------------------------------|-------|--------------------------------------------|------------------------|
|           |     | Cox1                                               | Cox2  | % < 0.05                                   | median                 |
| $n = 200$ |     |                                                    |       |                                            |                        |
| 0.2       | 0%  | <0.001                                             | 0.098 | 84.1                                       | $3.68 \times 10^{-3}$  |
|           | 15% | <0.001                                             | 0.103 | 78.8                                       | $6.44 \times 10^{-3}$  |
|           | 30% | <0.001                                             | 0.116 | 71.7                                       | $1.08 \times 10^{-2}$  |
|           | 50% | <0.001                                             | 0.131 | 62.8                                       | $2.11 \times 10^{-2}$  |
| 0.35      | 0%  | <0.001                                             | 0.099 | 100                                        | $4.24 \times 10^{-8}$  |
|           | 15% | <0.001                                             | 0.108 | 100                                        | $7.46 \times 10^{-8}$  |
|           | 30% | <0.001                                             | 0.121 | 100                                        | $2.95 \times 10^{-7}$  |
|           | 50% | <0.001                                             | 0.139 | 100                                        | $2.20 \times 10^{-6}$  |
| $n = 500$ |     |                                                    |       |                                            |                        |
| 0.2       | 0%  | <0.001                                             | 0.063 | 99.3                                       | $1.74 \times 10^{-6}$  |
|           | 15% | <0.001                                             | 0.068 | 99.5                                       | $7.31 \times 10^{-6}$  |
|           | 30% | <0.001                                             | 0.078 | 98.7                                       | $2.97 \times 10^{-5}$  |
|           | 50% | <0.001                                             | 0.092 | 95.4                                       | $2.17 \times 10^{-4}$  |
| 0.35      | 0%  | <0.001                                             | 0.064 | 100                                        | $2.19 \times 10^{-19}$ |
|           | 15% | <0.001                                             | 0.073 | 100                                        | $1.52 \times 10^{-18}$ |
|           | 30% | <0.001                                             | 0.082 | 100                                        | $3.60 \times 10^{-17}$ |
|           | 50% | <0.001                                             | 0.095 | 100                                        | $1.66 \times 10^{-14}$ |

<sup>†</sup>Cox1, adjusted transformation via Cox model with continuous  $T'(a)$ ; Cox2, adjusted transformation via Cox model with the first and second tertiles of  $T'(a)$ .

Table S6: Bias for  $\hat{a}$  under simulation setup in Section 4.2<sup>†</sup>

| $\tau$ | cen | bias( $\hat{a}$ )     |                         |                         | bias( $\hat{a}$ )     |                         |                         |
|--------|-----|-----------------------|-------------------------|-------------------------|-----------------------|-------------------------|-------------------------|
|        |     | $\hat{a}_{\text{CK}}$ | $\hat{a}_{\text{Cox1}}$ | $\hat{a}_{\text{Cox2}}$ | $\hat{a}_{\text{CK}}$ | $\hat{a}_{\text{Cox1}}$ | $\hat{a}_{\text{Cox2}}$ |
|        |     | $n = 200$             |                         |                         | $n = 500$             |                         |                         |
| 0.2    | 0%  | -0.308                | -0.004                  | -0.017                  | -0.306                | -0.002                  | -0.011                  |
|        | 15% | -0.285                | -0.017                  | -0.045                  | -0.280                | -0.010                  | -0.021                  |
| 0.35   | 0%  | -0.170                | -0.003                  | -0.011                  | -0.172                | -0.001                  | -0.007                  |
|        | 15% | -0.210                | -0.015                  | -0.024                  | -0.204                | -0.005                  | -0.009                  |

<sup>†</sup>CK, unadjusted transformation via conditional Kendall's tau; Cox1, adjusted transformation via Cox model with continuous  $T'(a)$ ; Cox2, adjusted transformation via Cox model with the first and second tertiles of  $T'(a)$ .
